# Supplementary material for: Hollow Ag/carbon microporous spheres with high catalytic activity based on a bio-inspiration polydopamine reaction platform
Source: Royal Society of Chemistry journal article supplement (doi:10.1039/c5ra21193j), 2015-01-01
Supplement: c5ra21193j2.pdf [file c5ra21193j2.pdf]

## **Supporting Information**

### **Microporous Ag/Carbon Hollow Spheres with High Catalytic Activity Based on Bio-Inspiration Polydopamine Reaction Platform**

Qian Zhang, Chen Zhou, and Aisheng Huang \*

Institute of New Energy Technology, Ningbo Institute of Material Technology and Engineering, CAS,  
1219 Zhongguan Road, 315201 Ningbo, P. R. China.

**Figure S1**

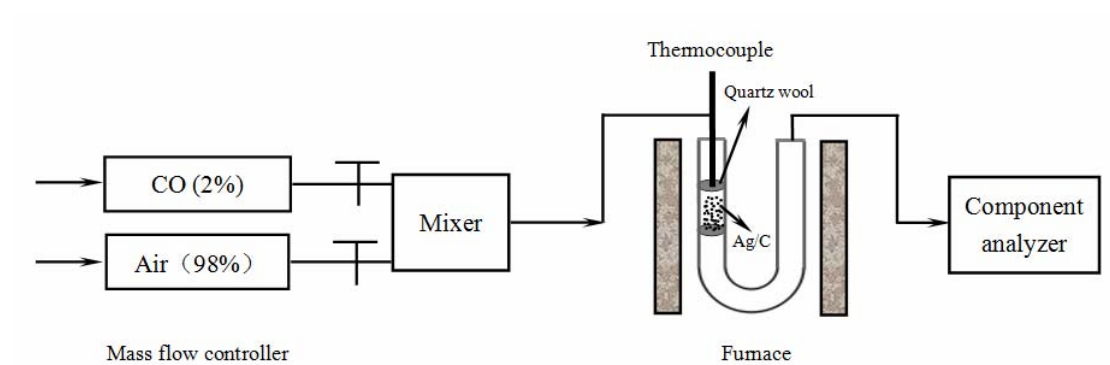

**Fig. S1.** Schematic diagram of the apparatus used for the the measurement of catalytic performance of the hollow Ag/Carbon towards CO oxidation (C. Zhou, Y. Zhang, L. Hu, H. Yin and W.Wang, *Chem. Eng. Technol.*, 2015, **38**, 291).

**Figure S2**

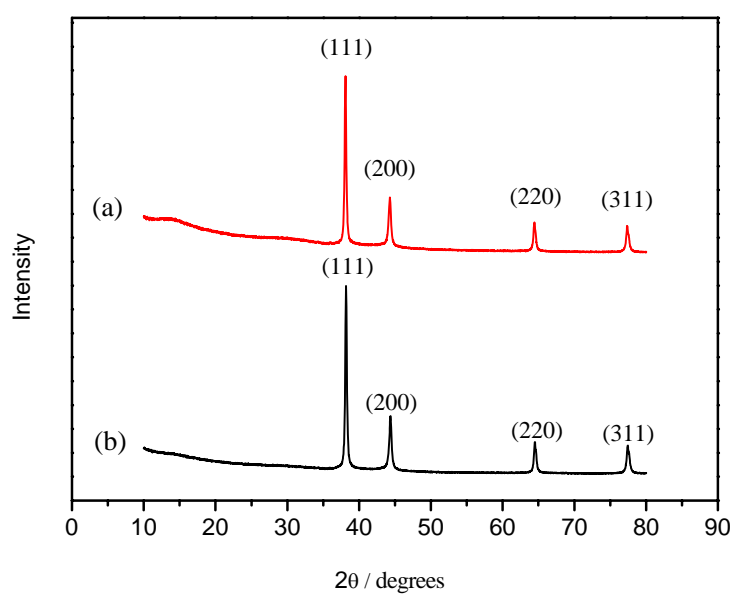

**Fig. S2.** XRD patterns of the Ag/PDA-PMMA spheres (a), and hollow Ag/Carbon spheres (b).

**Figure S3**

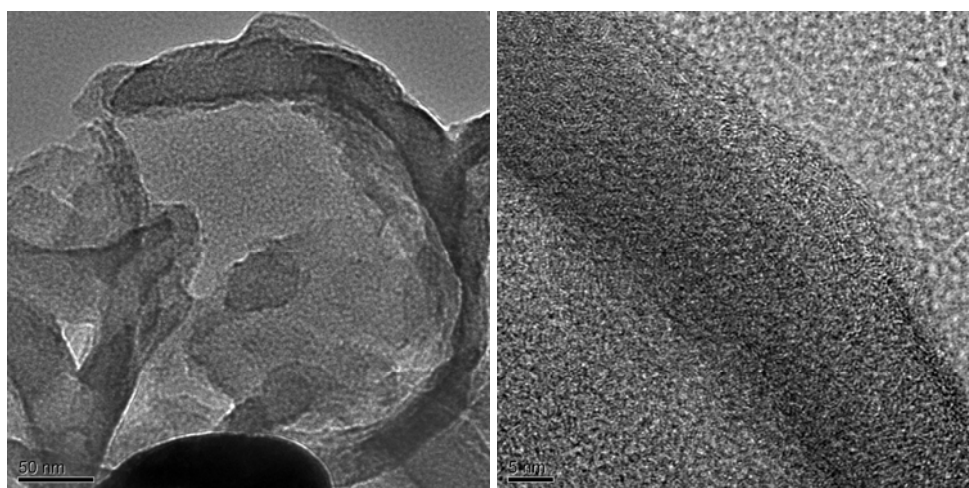

**Fig. S3.** TEM images of the hollow Ag/Carbon spheres.

**Figure S4**

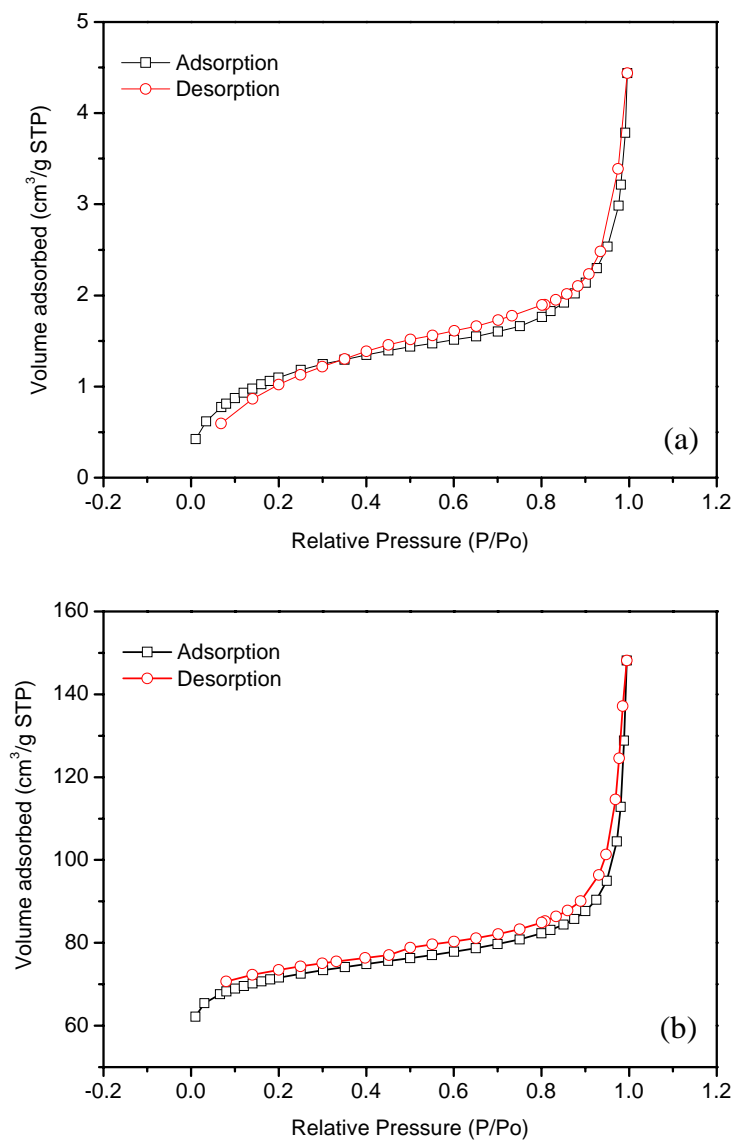

**Fig. S4.** N<sub>2</sub> adsorption/desorption (77 K) isotherms of the Ag/PDA-PMMA spheres (a), and hollow Ag/Carbon microporous spheres (b).

**Figure S5**

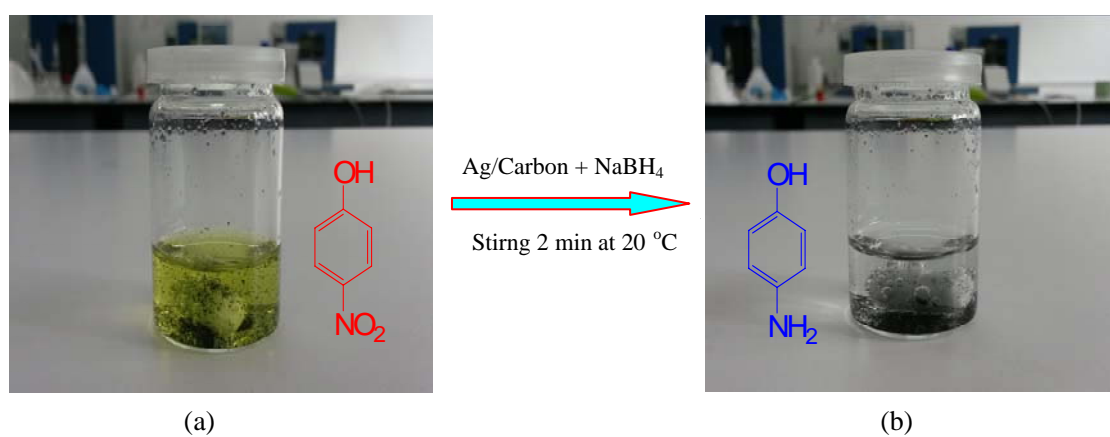

**Fig. S5.** Reaction scheme of the conversion of 4-nitrophenol to 4-aminophenol and corresponding colour change after reaction by using hollow Ag/Carbon spheres as catalyst.

**Figure S6**

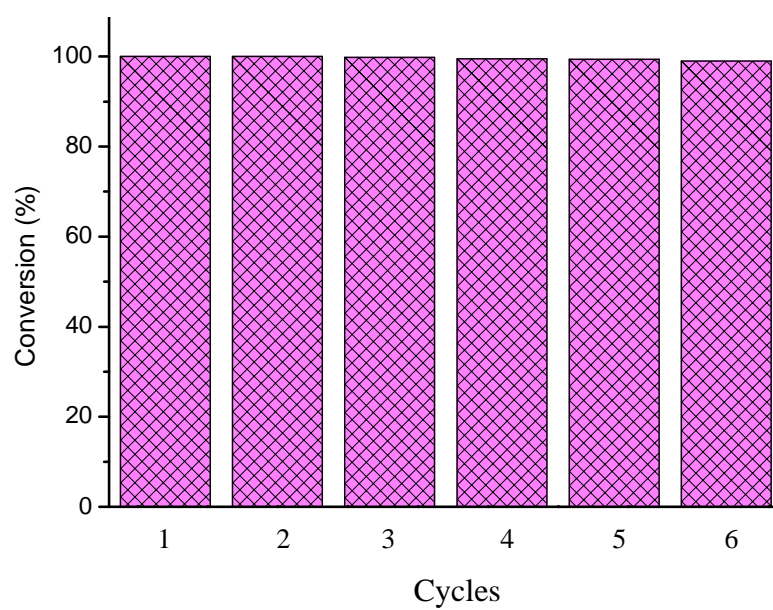

**Fig. S6.** Conversion of 4-nitrophenol in 2 min versus the number of catalyst recycles.
